# 1 Refinement of $\alpha$ -synuclein 2 ensembles against SAXS data: 3 Comparison of force fields and 4 methods

5 **Mustapha Carab Ahmed<sup>1</sup>, Line K. Skaanning<sup>2</sup>, Alexander Jussupow<sup>3</sup>, Estella A.  
6 Newcombe<sup>1</sup>, Birthe B. Kragelund<sup>1</sup>, Carlo Camilloni<sup>3,4</sup>, Annette E. Langkilde<sup>2</sup>,  
7 Kresten Lindorff-Larsen<sup>1,\*</sup>**

\*For correspondence:  
[lindorff@bio.ku.dk](mailto:lindorff@bio.ku.dk) (KLL)

8 <sup>1</sup>Structural Biology and NMR Laboratory & Linderstrøm-Lang Centre for Protein Science,  
9 Department of Biology, University of Copenhagen, Denmark; <sup>2</sup>Department of Drug  
10 Design and Pharmacology, University of Copenhagen, Denmark; <sup>3</sup>Department of  
11 Chemistry and Institute for Advanced Study, Technical University of Munich, Germany;  
12 <sup>4</sup>Dipartimento di Bioscienze, Università degli studi di Milano, Italy

---

14 **Abstract** The inherent flexibility of intrinsically disordered proteins (IDPs) makes it difficult to  
15 interpret experimental data using structural models. On the other hand, molecular dynamics  
16 simulations of IDPs often suffer from force-field inaccuracies, and long simulation times or  
17 enhanced sampling methods are needed to obtain converged ensembles. Here, we apply  
18 metainference and Bayesian/Maximum Entropy reweighting approaches to integrate prior  
19 knowledge of the system with experimental data, while also dealing with various sources of errors  
20 and the inherent conformational heterogeneity of IDPs. We have measured new SAXS data on the  
21 protein  $\alpha$ -synuclein, and integrate this with simulations performed using different force fields. We  
22 find that if the force field gives rise to ensembles that are much more compact than what is implied  
23 by the SAXS data it is difficult to recover a reasonable ensemble. On the other hand, we show that  
24 when the simulated ensemble is reasonable, we can obtain an ensemble that is consistent with the  
25 SAXS data, but also with NMR diffusion and paramagnetic relaxation enhancement data.

---

## 27 Introduction

28 Intrinsically Disordered Proteins (IDPs) play important roles in a wide range of biological processes in-  
29 cluding cell signalling and regulation (*Uversky et al., 2005; Das et al., 2015; Sneed and Eliezer, 2019*),  
30 and their malfunction or aggregation is linked to neurodegenerative diseases such as Alzheimer's  
31 and Parkinson's diseases. A key, defining property of IDPs is that they do not adopt well-defined,  
32 permanent secondary and tertiary structures under native conditions, and their conformational  
33 properties are thus best described in statistical terms.

34 Due to the dynamic nature of IDPs and their inherent conformational heterogeneity, IDPs are  
35 not easily amenable to high-resolution characterisation solely through experimental measurements.  
36 To characterise their structural and dynamic properties it is often necessary to integrate various  
37 biophysical experiments, and particularly nuclear magnetic resonance (NMR) spectroscopy (*Dyson  
38 and Wright, 2001*), small angle X-ray scattering (SAXS or SANS) (*Bernado and Svergun, 2012*), circular  
39 dichroism (*Chemes et al., 2012*), and single-molecule Förster resonance energy transfer (sm-FRET)

40 (*LeBlanc et al., 2018*) have been widely used to characterise the structural properties of IDPs. For  
41 instance, pulsed-field-gradient NMR diffusion and SAXS experiment are especially useful to quantify  
42 the level of compaction of the IDP. Techniques such as sm-FRET and NMR paramagnetic relaxation  
43 enhancement (PRE) provide distance information between different residues or regions of the IDP  
44 (*Dedmon et al., 2005; Eliezer, 2009*). Nevertheless, since most experimental methods only convey  
45 ensemble averaged information and are also affected by random and systematic errors, it is difficult  
46 to extract directly information on the underlying heterogeneous ensemble of the IDP. To address  
47 this problem, theoretical and computational models can be used to extract detailed structural  
48 information from these experiments.

49 Molecular dynamics (MD) simulations that use physics-based force fields may provide high-  
50 resolution temporal and spatial information about the structure and dynamics of IDPs. Extensive  
51 sampling of a force field with MD simulations can thus be used to generate conformational en-  
52 semble of the IDP. The quality of the results, however, depends heavily on the accuracy of the  
53 force field employed. For example it has been shown that many earlier generation of force fields  
54 produce overly compact conformations for many IDPs (*Piana et al., 2015*). It appears that these  
55 force fields fail to accurately describe the solvation of the protein by underestimating protein-water  
56 interactions (*Sun and Kollman, 1995; Nerenberg et al., 2012; Best et al., 2014; Piana et al., 2015*).  
57 Recently, however, significant advancements have been made to improve force field accuracy and  
58 correct the bias towards overly compact conformations (*Best et al., 2014; Piana et al., 2015; Song  
59 et al., 2017; Robustelli et al., 2018*). Adding to these issues, the large conformational phase space  
60 of IDPs, requires extensive sampling of the protein is in order to generate converged ensembles. To  
61 achieve sufficient sampling, and push the sampling capacity of MD simulations, one often employs  
62 enhanced sampling methods such as metadynamics (*Barducci et al., 2008*) or parallel-tempering  
63 replica exchange (*Sugita and Okamoto, 1999*). Notably, force field and sampling problems are  
64 expected to be more severe for longer IDPs.

65 An approach to address the challenges of force-field accuracy is to combine experimental and  
66 theoretical information in order to obtain conformational ensembles of IDPs that agree with experi-  
67 mental measurements. In this way, the simulations are used as a tool to interpret experimental  
68 measurements. A number of different approaches have been described and can, roughly, be  
69 divided into two different classes in which the experimental data is either (i) used for on-the-fly  
70 restraining of a simulation to experimental data, or (ii) post-processing ensembles generated by  
71 simulations to match experimental data by reweighting or selection methods. Many different such  
72 methods exist and we refer to a recent reviews for additional details (*Cesari et al., 2018; Orioli  
73 et al., 2020*).

74 Because the conformational ensembles are broad and the experimental data often have low  
75 information content and may be noisy, in particular Bayesian inference methods (*Box and Tiao,  
76 2011*) and the maximum entropy principle (*Jaynes, 1957*) have emerged as particularly successful  
77 frameworks for studying IDPs. In these frameworks, an ensemble generated using a prior model  
78 is minimally modified to match the experimentally observed data better. An extension of these  
79 frameworks for integrative structural ensemble determination is Metainference Metadynamics  
80 (M&M) (*Bonomi et al., 2016a*), that combines multi-replica all-atom molecular dynamics simulations  
81 with ensemble averaged experimental data (*Bonomi et al., 2016b*). In the M&M approach, the  
82 metainference (*Bonomi et al., 2016a*) part is a Bayesian inference method that allows for the  
83 integration of experimental information with prior knowledge of the system from e.g. physics-  
84 based force fields, while also dealing with uncertainty and errors as well as conformationally  
85 heterogeneous systems. In addition, metainference can be combined with metadynamics (*Laio and  
86 Parrinello, 2002; Bonomi et al., 2016b*) to accelerate sampling further. While metainference applies  
87 the bias on the fly, other Bayesian formalisms takes as input simulations that were generated  
88 without taking the experimental data into account, and subsequently updates this using statistical  
89 reweighting. Such approaches include our Bayesian/Maximum Entropy (BME) protocol (*Bottaro  
90 et al., 2020*), as well as related methods (*Hummer and Köfinger, 2015*).

91 Here, we combined ensemble-averaged experimental SAXS data with MD simulations with the  
92 aim to achieve structural ensembles of the system which are in agreement with the experimental  
93 data. We did so using both metainference and BME. In particular, we used BME to refine ensembles  
94 that had previously been generated using MD simulations (*Piana et al., 2015; Robustelli et al.,*  
95 *2018*), while metainference was applied to restrain experimental SAXS data during MD simulations  
96 with an implicit solvent model (*Bottaro et al., 2013*). We used the intrinsically disordered protein  
97  $\alpha$ -synuclein ( $\alpha$ SN) protein as a model, as this protein has been studied extensively by various  
98 experimental methods including SAXS and NMR measurements, and because of the availability  
99 of long MD trajectories generated from a range of force fields and water models.  $\alpha$ SN is a 140  
100 residue long IDP that is primarily expressed in the brain and in its monomeric state is known to  
101 be disordered and populate multiple conformational states.  $\alpha$ SN aggregation into amyloid fibrils  
102 is linked to Parkinson's disease and dementia with Lewy bodies (*Spillantini and Goedert, 2000;*  
103 *Ulusoy and Di Monte, 2013*).

104 We assessed the quality of existing ensembles before refinement, and the ability of metainfer-  
105 ence and BME methods to improve them through incorporation of experimental SAXS data, by  
106 comparing with independent measurements of the level of compaction (through the hydrodynamic  
107 radius,  $R_h$ , as probed by NMR) and previously measured paramagnetic relaxation enhancement data  
108 (*Dedmon et al., 2005*). We find that the inclusion of SAXS-restraint in the M&M simulation resulted  
109 in the generation of a reliable and heterogenous conformational ensemble that also improved the  
110 agreement with the NMR diffusion data. The BME reweighting improved the agreement with the  
111 experimental data when we applied the approach to simulations with the TIP4P-D water model. For  
112 simulations using the TIP3P water model, which were substantially more compact, it was difficult to  
113 find a suitably large ensemble compatible with the experimental SAXS data. Together, our result  
114 provide insight into how and when experimental SAXS data can be used to refine ensembles of IDPs,  
115 and the role played by the force field as a 'prior' in these Bayesian/Maximum entropy approaches.

## 116 Methods and Materials

### 117 Experimental data

118 Human  $\alpha$ SN for SAXS experiments was expressed, purified and lyophilized as previously described  
119 (*van Maarschalkerweerd et al., 2014*). Prior to SAXS data collection, the lyophilized powder was  
120 dissolved in PBS (20 mM Na<sub>2</sub>HPO<sub>4</sub>, 150 mM NaCl, pH 7.4) and filtered through a 0.22  $\mu$ m filter to  
121 remove larger aggregates. The final sample concentration before SEC-SAXS was determined by  
122  $A_{280}$  to be 4.5 mg/mL using an extinction coefficient of 5960 M<sup>-1</sup> cm<sup>-1</sup>. SAXS data was collected as  
123 SEC-SAXS data on beamline P12 (*Blanchet et al., 2015*) operated by EMBL Hamburg at the PETRA  
124 III storage ring (DESY, Hamburg, Germany). 50  $\mu$ L 4.5 mg/mL  $\alpha$ SN in PBS buffer (20 mM Na<sub>2</sub>HPO<sub>4</sub>,  
125 150 mM NaCl, pH 7.4) was injected on a Superdex 200inc 5/150 GL column with a flowrate of 0.4  
126 mL/min. The column was pre-equilibrated with the running buffer (PBS with 2% (v/v) glycerol).  
127 SAXS data were collected at 20 °C, with continuous exposure of 1 s per frame throughout the SEC  
128 elution. Data processing was done using CHROMIXS (*Panjkevich and Svergun, 2018*), averaging  
129 sample data from the frames in the monomeric peak and subtracting the buffer signal taken from  
130 the flow-through prior to the sample elution to obtain the final scattering profile (Fig. S1).

131 We purified  $\alpha$ SN for NMR experiments as previously described (*Skaanning et al., 2020*). Trans-  
132 lational diffusion constants for  $\alpha$ SN (50  $\mu$ M) and 1,4-dioxane (0.2% v/v; as internal reference) were  
133 determined by fitting peak intensity decay from diffusion ordered spectroscopy experiments (*Wu*  
134 *et al., 1995*), using the Stejskal-Tanner equation as described (*Prestel et al., 2018*). Spectra (a total  
135 of 64 scans) were obtained over a gradient strength of 2 to 98%, with a diffusion time ( $\Delta$ ) of 200  
136 ms and gradient length ( $\delta$ ) of 3 ms. Diffusion constants were used to estimate the hydrodynamic  
137 radius for  $\alpha$ SN described (*Wilkins et al., 1999; Skaanning et al., 2020*) (Fig. S2).

138 We used previously measured PRE data obtained by measuring intensity ratios with spin-labels  
139 added at five different positions (residue: 24, 42, 62, 87 and 103) (*Dedmon et al., 2005*).

| Force field           | Water model  | Time( $\mu$ s)   | $R_g$ Force field( $\text{\AA}$ ) | $R_g$ Reweighted( $\text{\AA}$ ) | $R_h$ Force field( $\text{\AA}$ ) | $R_h$ Reweighted( $\text{\AA}$ ) |
|-----------------------|--------------|------------------|-----------------------------------|----------------------------------|-----------------------------------|----------------------------------|
| A12                   | TIP3P        | 5                | 15.4 $\pm$ 0.1                    | 19 $\pm$ 1                       | 20.8 $\pm$ 0.1                    | 23.0 $\pm$ 0.1                   |
| A99SB-ILDN            | TIP3P        | 5                | 15.3 $\pm$ 0.2                    | 16.0 $\pm$ 0.3                   | 20.6 $\pm$ 0.3                    | 21.3 $\pm$ 0.3                   |
| C22*                  | TIP3P        | 6                | 17.1 $\pm$ 0.4                    | 23 $\pm$ 1                       | 22.2 $\pm$ 0.3                    | 26.1 $\pm$ 0.5                   |
| A99SB-ILDN            | TIP4P-EW     | 5                | 17.9 $\pm$ 0.8                    | 24 $\pm$ 1                       | 22.8 $\pm$ 0.6                    | 26.4 $\pm$ 0.6                   |
| C22*                  | TIP4P-D      | 20               | 23.3 $\pm$ 0.6                    | 29.3 $\pm$ 0.9                   | 26.7 $\pm$ 0.3                    | 29.6 $\pm$ 0.4                   |
| A99SB-ILDN            | TIP4P-D      | 11               | 25.7 $\pm$ 0.1                    | 31 $\pm$ 1                       | 27.2 $\pm$ 0.6                    | 30 $\pm$ 1                       |
| A12                   | TIP4P-D      | 11               | 29.7 $\pm$ 0.5                    | 34.1 $\pm$ 0.3                   | 29.7 $\pm$ 0.2                    | 32 $\pm$ 0.5                     |
| A03ws                 | TIP4P/2005   | 20               | 30 $\pm$ 2                        | 34.3 $\pm$ 0.6                   | 29.1 $\pm$ 1.1                    | 32 $\pm$ 1                       |
| A99SB- <i>disp</i>    | <sup>1</sup> | 73               | 28.7 $\pm$ 1.3                    | 31.9 $\pm$ 0.9                   | 27.8 $\pm$ 0.6                    | 30.8 $\pm$ 0.8                   |
| CHARMM36 <sup>2</sup> | EEF1-SB      | 3.2 <sup>3</sup> | 46.1 $\pm$ 3.7                    | 35.4 $\pm$ 0.5                   | 37.6 $\pm$ 2.5                    | 33.1 $\pm$ 0.5                   |
| <b>Experiment</b>     |              |                  | 35.5 $\pm$ 0.5                    |                                  | 28.6 $\pm$ 0.7                    |                                  |

**Table 1.** Ensembles analysed and refined. <sup>1</sup> A99SB-*disp* uses a modified version of the TIP4P-D water model. <sup>2</sup> CHARMM36 with EEF1-SB was only used for the metainference metadynamics simulations; here ‘force field’ and ‘reweighted’ refers to two different simulations with and without the experimental bias, respectively. <sup>3</sup> Metadynamics simulation time.

## Bayesian/Maximum Entropy Reweighting of Unbiased MD simulations

We used previously generated ensembles of  $\alpha SN$  obtained by long timescale MD simulations with different force fields from the CHARMM and Amber families (here abbreviated by C and A, respectively) and water models (Piana *et al.*, 2015; Robustelli *et al.*, 2018) (Table 1). The published simulation using Amber ff99SB-*disp* (Robustelli *et al.*, 2018) was later found to be affected by interactions with its periodic image, and has here been replaced by a 73  $\mu$ s long simulation performed using the same setup but in a 160 $\text{\AA}$  box and available directly from D. E. Shaw Research.

We used our Bayesian/Maximum Entropy (BME) protocol (Bottaro *et al.*, 2020; Ahmed *et al.*, 2020) to reweight the initial force field ensembles (Table 1) with the experimental SAXS data, thus obtaining ensembles that are in closer agreement to the experimental data. Briefly described, the BME approach is based on a combined Bayesian/Maximum entropy framework, that enables one to refine a simulation using experimental data while also taking into account the potential noise in the data and in the so-called forward model used to calculate observables for the ensemble. The purpose of the reweighting is to derive a new set of weights for each configuration in a previously generated ensemble so that the reweighted ensemble satisfies the following two criteria: (i) it matches the experimental data better than the original ensemble and (ii) it achieves this improved agreement by a minimal perturbation of the original ensemble. When the initial weights in the ensemble are uniform ( $w_j^0 = 1/n$ ), such as when the ensemble has been generated by standard MD simulations, the BME reweighting approach seeks to update the weights,  $w_j$ , by minimising the function:

$$\mathcal{L}(w_1 \dots w_n) = \frac{1}{2} \chi^2(w_1 \dots w_n) - \theta S_{\text{rel}}(w_1 \dots w_n) \quad (1)$$

Here,  $\chi^2$  quantifies the agreement between the experimental data and the corresponding observable calculated from the reweighted ensemble.  $S_{\text{rel}} = -\sum_j^n w_j \log(w_j/w_j^0)$  measures the deviation between the original ensemble weights,  $w_j^0$ , in our case taken as  $1/n$ , and the reweighted ensemble weights. Finally, the hyperparameter  $\theta$  tunes the balance between the two terms, and needs to be determined, by evaluating the compromise between the two terms in Equation 1 (Orioli *et al.*, 2020). Reweighting and analysis scripts are available at [github.com/KULL-Centre/papers/blob/master/2021/aSYN-ahmed-et-al/](https://github.com/KULL-Centre/papers/blob/master/2021/aSYN-ahmed-et-al/).

## Metainference Metadynamics

We conducted SAXS-restrained MD simulation using the metainference metadynamics (M&M) method, where we employed the parallel-bias (PBMetaD) flavour of well-tempered metadynamics (Pfaendtner and Bonomi, 2015) in combination with the multiple-walkers scheme (Raiteri *et al.*, 2006). During the M&M simulation, the SAXS back-calculation step utilises a hybrid-resolution approach, where the SAXS data is calculated on-the-fly using ‘Martini beads’ that are superimposed

173 on the all-atom structures using PLUMED (Bonomi and Camilloni, 2017; Papissoni et al., 2019, 2020;  
174 Jussupow et al., 2020). The approach is particularly efficient as the SAXS back-calculation is calcu-  
175 lated using the Debye equation from a coarse-grained model and the excess of electron density in  
176 the hydration shell is neglected (Niebling et al., 2014; Papissoni et al., 2020). We note here that the  
177 Martini model is only used for calculating the SAXS data, and the simulations are performed using  
178 an all-atom, implicit solvent model as detailed below.

179 We used GROMACS 2018.1 (Abraham et al., 2015) with PLUMED version 2.4 (Tribello et al., 2014)  
180 to perform the *M&M* simulations. We used the CHARMM36 force field (Best et al., 2012) with the  
181 EEF1-SB implicit solvent model (Bottaro et al., 2013). We used a previously generated structure  
182 of  $\alpha$ SN bound to micelles (Ulmer et al., 2005) as starting point for an initial 100-ns long high  
183 temperature (500 K) simulation, from which we extracted 64 starting conformations for the multi-  
184 replica *M&M* simulation. Charged amino acids were neutralised in line with the parameterisation  
185 of the EEF1 model (Lazaridis and Karplus, 1999; Bottaro et al., 2013), leaving a neutral molecule,  
186 and performed a minimisation to a maximum force of 100 kJ/mol/nm. The system was further  
187 equilibrated for 20 ns per replica with the metainference bias. For the production simulations the  
188 sampling of each replica was enhanced by PBMetaD along with twelve collective variables (CVs)  
189 consisting of the radius of gyration and 11 AlphaRMSD CVs to enhance sampling of local backbone  
190 conformations (Tribello et al., 2014). Gaussians were deposited every 200 steps with a height of 0.1  
191 kJ/mol/ps, and the  $\sigma$  values were set to 0.2 nm for CVrg and 0.010 for all AlphaRMSD CVs, respectively.  
192 We rescaled the height of the Gaussians using the well-tempered scheme with a bias-factor of 20  
193 (Barducci et al., 2008).

194 Because calculation of the SAXS data is limiting in these simulations, we re-binned the experi-  
195 mental SAXS data to a set of 19 SAXS intensities at different scattering vectors, ranging between  
196 0.01  $\text{\AA}^{-1}$  and 0.20  $\text{\AA}^{-1}$ . Metainference was applied every 10 steps of the simulation. We used  
197 a Gaussian noise model, that applies a single Gaussian per SAXS data-point. The scaling factor  
198 between experimental and calculated SAXS intensities was sampled with a flat prior between 0.5  
199 and 2.0 (Löhr et al., 2017). We average the estimated metainference weights over a time window of  
200 200 steps; this is done to avoid large fluctuations and prevent numerical instabilities due to too  
201 high instantaneous forces (Löhr et al., 2017). The Plumed input file is available in the PLUMED-NEST  
202 database (Bonomi et al., 2019) (plumID:21.003; [www.plumed-nest.org/eggs/21/003/](http://www.plumed-nest.org/eggs/21/003/)).

### 203 Paramagnetic Relaxation Enhancement

204 Paramagnetic Relaxation Enhancement (PRE) via nitroxide spin-labels has been used extensively to  
205 study long-range interactions within IDPs. The measured PRE depends in particular on the distance  
206 between a paramagnetic centre and protein nuclei, in this case backbone amides. Because the  
207 PRE originates from a dipolar interaction, the observed PRE depends on  $r^{-6}$ , and is thus particularly  
208 sensitive to transient, short distances. Because simulations were performed without the spin-labels,  
209 and because multiple spin-labels were used to probe the structural ensemble of  $\alpha$ SN, we used a  
210 post-processing approach to estimate the location of the unpaired electron on the nitroxide label. In  
211 particular, we used DEER-PREdict (Tesei et al., 2020), which is based on a Rotamer Library Approach  
212 to place spin labels on the protein, to estimate PRE rates. We calculated and compared results from  
213 five paramagnetic labelling positions (residue: 24, 42, 62, 87, 103) in  $\alpha$ SN (Dedmon et al., 2005).  
214 Additional details are available in the Supplementary Information and in the DEER-PREdict paper  
215 (Tesei et al., 2020).

### 216 Results and Discussion

217 Using  $\alpha$ SN as an example, we compared conformational ensembles generated either directly using  
218 molecular dynamics simulations with a molecular mechanics force field, or the same ensemble  
219 refined using SAXS data. We also analysed the results of an approach (M&M) that performs this  
220 refinement during the simulation. We thus performed (i) a SAXS-restrained multi-replica simulations  
221 using metainference metadynamics and (ii) a reference simulation both using CHARMM36 force

222 field (*Best et al., 2012*) used with the EEF1-SB implicit solvent model (*Bottaro et al., 2013*). Both  
223 simulations consisted of 64 replicas, with one simulation using metainference to enforce the  
224 agreement with experimental SAXS data, whereas a second, reference simulation did not use  
225 experimental restraints and thus sampled the force field only. We also analysed nine previously  
226 published multi- $\mu$ s MD simulations which had been generated using different combinations of  
227 proteins force fields and water models (*Piana et al., 2015; Robustelli et al., 2018*) from the AMBER  
228 (*Lindorff-Larsen et al., 2010; Hornak et al., 2006; Best and Hummer, 2009; Robustelli et al., 2018*)  
229 and CHARMM (*Piana et al., 2011*) families in combination with either standard TIP3P (*Jorgensen,*  
230 *1981*), TIP4P-EW (*Horn et al., 2004*), TIP4P/2005 (*Abascal and Vega, 2005*) or the TIP4P-D (*Piana*  
231 *et al., 2015*) water model. Table 1 summarises the simulations and below we refer to the prior  
232 (not refined) ensemble as the ‘force field’ ensemble and the posterior (refined) ensemble as the  
233 ‘reweighted’ ensemble.

### 234 **Force Field Accuracy and Sampling**

235 Before the refinement procedure we calculated SAXS intensity curves from each structure in the  
236 ensembles using PEPSI-SAXS (*Grudin et al., 2017*). We also calculated the  $R_g$  from the protein  
237 coordinates and used them to estimate the hydrodynamic radius ( $R_h$ ) for each conformation using  
238 a previously described empirical relationship (*Nygaard et al., 2017; Ahmed et al., 2020*) (Table 1).  
239 The experimental  $R_g = 35.5$  Å was obtained through Guinier analysis of the experimental SAXS  
240 curve (see Methods), while the experimental  $R_h = 29.0$  Å was obtained through NMR diffusion  
241 measurements (Table 1).

242 In line with previous observations (*Piana et al., 2015; Robustelli et al., 2018*), the ensembles  
243 show very different levels of compaction depending on the force field and, in particular, water  
244 model used (Table 1 and Fig. 1). When paired with the TIP3P water model, both the Amber or  
245 CHARMM force fields produce very compact conformations and show poor agreement with the  
246 experimental value of  $R_g$ . On the other hand, when paired with the recently parameterised TIP4P-D  
247 water model the force fields give rise to more expanded structures and match the experimental  
248 values of  $R_g$  and  $R_h$  considerably better. The ensemble generated using CHARMM36 with the  
249 EEF1-SB implicit solvent model on the other-hand produce more expanded structures (Table 1).  
250 Of particular relevance to the reweighting described below it is worth noting how the compact  
251 ensembles either do not sample any, or at most very few, structures that are expanded as the  
252 *average*  $R_g$  observed in experiment (Fig. 1). This observation already suggests that it will be difficult  
253 robustly to derive ensembles that are in agreement with the SAXS data as this in particular is  
254 sensitive to the  $R_g$ .

### 255 **Ensemble refinement using SAXS data**

256 In the following section we exemplify the BME refinement against the SAXS data using two repre-  
257 sentative combinations of force field and water models, specifically A12 paired with either the TIP3P  
258 or the TIP4P-D water model (Figure 2). We also present the results obtained from ‘on-the-fly’ SAXS-  
259 restrained simulation with M&M which we compared to an unrestrained simulation with otherwise  
260 identical simulation settings (see Methods). Note that while the  $R_g$  values for the simulations were  
261 calculated using protein coordinates, the experimental value also includes potential contributions  
262 from the solvent. The refinement, analysis and plots for the remaining force fields are shown in the  
263 supplementary information (Figs. S4–S10).

264 The BME procedure works by assigning weights to a previously generated ensemble so as to fit  
265 the experimental data better. For BME to successfully reweight an ensemble it is thus required that  
266 the initial prior ensemble contains the most relevant conformational states of the protein, such  
267 that the ensemble that gives rise to the experimental data is a sub-ensemble of the initial prior  
268 ensemble. Consequently, if the sampling is incomplete or the unbiased ensemble is very far away  
269 from the true ensemble, it may not be possible to reweight the ensemble to reach a satisfactory  
270 agreement with the experiments. An indication that this is occurring is that BME will effectively

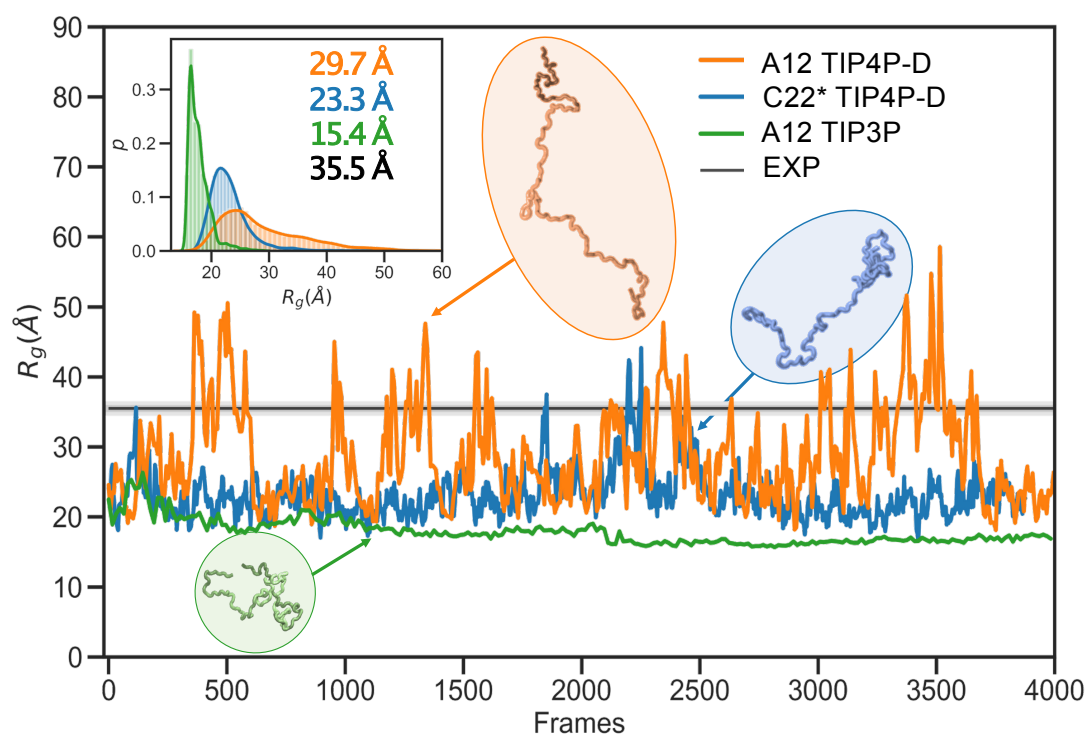

**Figure 1. Radius of gyration during simulations with different force fields and water models.** As representative examples we show the time-evolution of the radius of gyration for simulations of  $\alpha S N$  performed with the A12 force field (orange), C22\* (blue) and A12 (green) with the TIP4P-D, TIP4P-D and TIP3P water model respectively. The experimental value (black) was obtained from a Guinier analysis of the SAXS data. The orange and blue curves have been smoothed to ease visualization. The insert shows probability densities and averages of  $R_g$ . Representative structures with different degree of compaction is also shown. The length of the simulations are 11  $\mu s$ , 20  $\mu s$  and 5  $\mu s$ , respectively, but are shown here on a normalised timescale to make comparisons easier.

271 down-weight most of the structures in the prior ensemble and the posterior ensemble will be  
 272 dominated by a few structures with large weights. This can in turn be quantified by calculating  
 273 the (effective) fraction of structures,  $\phi_{eff} = \exp(S_{rel})$ , that contribute to the ensemble (*Orioli et al.*,  
 274 **2020**), so that when  $\phi_{eff} \approx 1$  most of the structures are retained, whereas  $\phi_{eff} \approx 0$  indicates a few  
 275 structures with very large weights

276 In the BME reweighting the confidence in the prior ensemble with respect to the experimental  
 277 data can be tuned by the hyper-parameter  $\theta$  (Eq. 1). One usually does not know the optimal value  
 278 for  $\theta$  beforehand. Here, we choose  $\theta$  by performing an L-curve analysis (*Hansen and O'Leary, 1993*;  
 279 *Orioli et al., 2020*) in which we plot the  $\chi_{red}^2$  value (quantifying the difference between experiments  
 280 and calculated value) as a function of  $\phi_{eff}$ , for different values of  $\theta$  and choose a value corresponding  
 281 to the 'elbow' region (blue region in Fig. 2A and B). The L-curve analysis for the A12 force field paired  
 282 with TIP4P-D water model, lead us to choose  $\theta = 1000$ , after which the ensemble retains 88% of  
 283 the initial structures in the final reweighted ensemble, and show much better agreement with  
 284 the experimental data, indicative by a low  $\chi_{red}^2$  (Fig. 2A). In contrast, the analysis for the TIP3P  
 285 water model, after reweighting with  $\theta = 6000$ , show that only 12% of the initial structures are  
 286 used in the final reweighted ensemble in order to achieve significant improved agreement with  
 287 the experimental data (Fig. 2B). Even at a lower  $\theta$  value there is still a large discrepancy between  
 288 experimental and calculated SAXS data ( $\chi_{red}^2 = 17$  at  $\theta = 500$ ). This is a clear example of a poor  
 289 prior ensemble, which is caused by insufficient overlap between the force field ensemble and that  
 290 probed by experiment. In fact, the highest value observed ( $R_g = 23$  Å) is significantly lower than  
 291 the experimental value (black). As a consequence, BME 'throws out' most of the structures from

292 the initial force field ensemble, and the final reweighted ensemble mainly consist of a few highly  
 293 weighted structures (Fig. 2D).

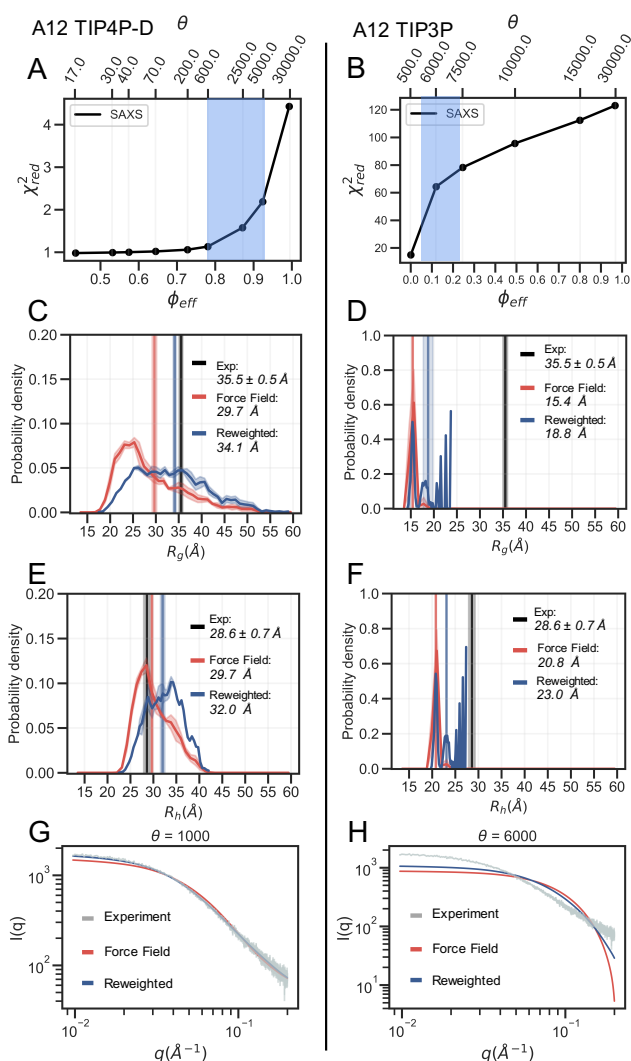

**Figure 2. Refinement of two ensembles using BME with SAXS data.** SAXS refinement of an ensemble sampled with A12 and either (left) the TIP4P-D water model or (right) the TIP3P water model. (A, B) In the L-curve analysis to select the parameter  $\theta$  we plot  $\chi^2$  against  $\phi_{eff}$ .  $\theta$  balances the prior (force field) and the experimental data,  $\phi_{eff}$  is the effective number of frames used in the final reweighted ensemble. A value of  $\theta$  is selected from the region marked in blue. We here used  $\theta = 1000$  and  $\theta = 6000$  for the TIP4P-D ensemble and TIP3P ensemble, respectively. Probability distribution of (C, D)  $R_g$  and (E, F)  $R_h$  for the prior (red) and reweighted (blue) ensembles. Solid vertical lines represents the ensemble averaged  $R_g$  and  $R_h$ . The experimental values are shown in black. The error of the distributions and on the averages (shown as shades) were estimated by block averaging. (G, H) Calculated SAXS intensities from the prior ensemble and the reweighted ensembles and are compared to the experimental SAXS data.

294 The ensemble generated with the TIP4P-D water model (Fig. 2C) contains structures that span a  
 295 greater range of  $R_g$  values, both above and below the experimental value. After refinement the  
 296 reweighted ensemble is shifted to give greater weight to more expanded structures and bringing  
 297 the average  $R_g$ , substantially closer to the value estimated from the SAXS data. We note here that  
 298 we do not fit the  $R_g$  value but rather the SAXS data. Because the experimental value of  $R_g$  (obtained  
 299 from a Guinier analyses of the data) contains a contribution from the solvent we do not expect a  
 300 perfect agreement with the average  $R_g$  calculated from the protein coordinates (Henriques et al.,  
 301 2018). Indeed, this is one of the reasons why we fit the SAXS data directly rather than the  $R_g$ .



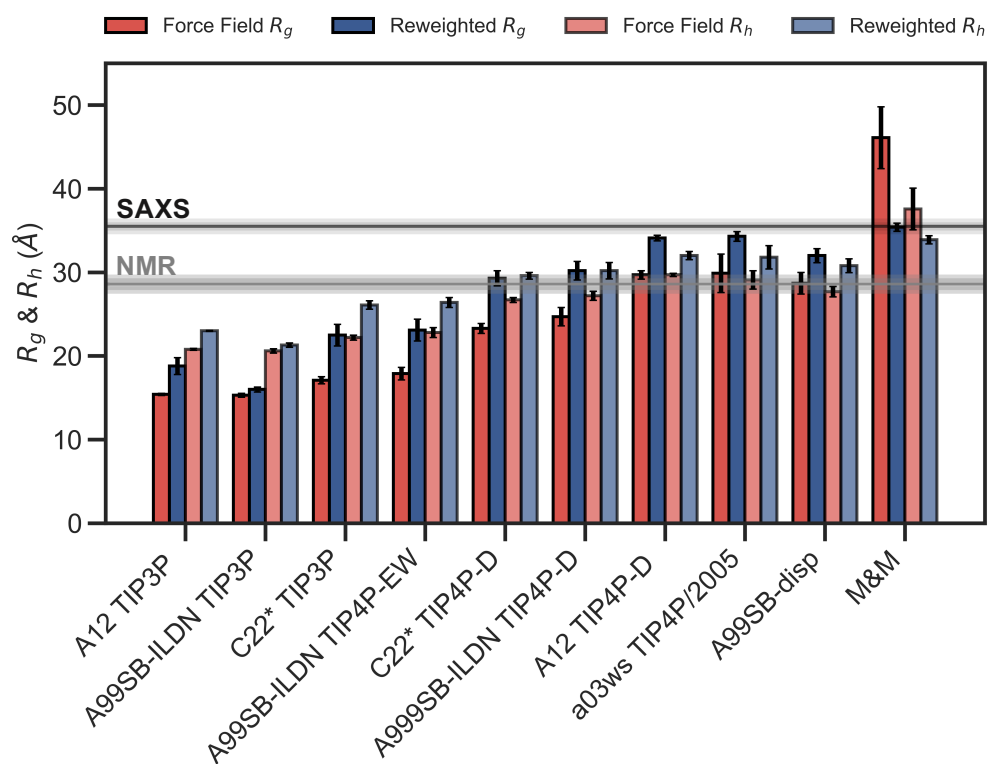

**Figure 3.** Radius of gyration and hydrodynamic radius calculated from the initial force field ensemble (red) and the experimentally refined ensembles (blue). Experimental values from SAXS ( $R_g = 35.5\text{\AA}$ ) and NMR ( $R_h = 29.0\text{\AA}$ ) are shown as horizontal lines with the shaded area indicating the error of the experimental values.

302 The effect of reweighting of the two ensembles can also be seen on the distributions of  $R_h$   
 303 (Fig. 2E and F). Similarly to  $R_g$  distributions, the TIP4P-D ensemble is shifted to give greater weight  
 304 to more expanded structures (Fig. 2E). As was also evident from the distribution of  $R_g$ , the more  
 305 compact TIP3P ensemble gives rise to a very noisy distribution, because the reweighted ensemble  
 306 predominantly consist of a few highly weighted structures (Fig. 2F). To illustrate the consequences of  
 307 reweighting we also compared the calculated SAXS data from the initial force field and reweighted  
 308 ensembles to the experimental scattering data (Fig. 2G and H). As expected, the refined ensembles  
 309 show better agreement with experiments, in particular for the A12 paired with TIP4P-D. As agree-  
 310 ment between experimental and calculated data is the target for BME this observation again just  
 311 illustrates that the BME method is indeed optimising agreement.

312 We repeated these analysis for the remaining combinations of force fields and water models  
 313 (Figs. S4–S10) and summarise the results by assessing how well the ensembles reproduce  $R_g$  and  
 314  $R_h$  before and after refinement (Fig. 3). We note that the improvement of the  $R_g$  observed is due  
 315 to the use of SAXS data in the refinement, as SAXS intensity curve inherently contains information  
 316 of the  $R_g$ , and that improved agreement with the  $R_g$  is thus a sign of the BME approach working  
 317 rather than a validation of the ensemble.

318 To evaluate the effectiveness of the SAXS-restrained M&M simulation we monitored the agree-  
 319 ment between the back-calculated and the experimental data over the simulation time by moni-  
 320 toring their correlation rather than the  $\chi^2$  (Paissoni et al., 2020). Both the SAXS-restrained and  
 321 the unrestrained reference simulation show a high correlation between back-calculated and ex-  
 322 perimental data ( $> 0.98$ ) (Fig. S3A). As expected, the agreement improves substantially when the

323 experimental data is used as a bias in the metainference simulations, confirming the effective-  
324 ness of the inclusion of experimental SAXS data (Fig. S3A). Likewise, the average  $R_g$ ,  $R_h$  and the  
325 back-calculated SAXS intensity data show improved agreement with the experimental data in the  
326 metainference produced ensemble (Fig. 3 and Fig. S3).

327 In total our analyses show that it is possible to refine MD simulations against SAXS data, though  
328 the extent to which agreement can be reached depends on the quality of the input ensemble. For  
329 the most compact ensembles we are able to increase the average compaction by fitting to the  
330 data, though the average  $R_g$  and  $R_h$  are still substantially below the experimental values. While the  
331 SAXS data (and thus  $R_g$ ) were used as target values, we also cross-validated with  $R_h$  which was not  
332 used in the fitting. Here, the picture is less clear. Overall, for the more compact ensembles, fitting  
333 the SAXS data lead to improved prediction of  $R_h$ . For other ensembles, such as A12 with TIP4P-D,  
334 that show good agreement with  $R_h$  before reweighting, the agreement became slightly worse  
335 after reweighting. Finally, for the most expanded ensemble obtained with CHARMM36/EEF1-SB,  
336 agreement with  $R_h$  improved after biasing with the SAXS data. We note, however, that the approach  
337 we use to estimate  $R_h$  from the ensembles is approximate and requires further assessment before  
338 these small differences can be interpreted further.

### 339 Validation with PRE data

340 PRE experiments probe the population-weighted average of the distance (as  $r^{-6}$ ) between a param-  
341 agnetic centre and protein nuclei, and given the  $r^{-6}$  dependency is sensitive to the shorter distances  
342 even if the populations are small. Here, we compare previously published PREs from spin-labelled  
343  $\alpha$ SN (*Dedmon et al., 2005*) and back-calculated PRE intensity ratios from five labelling sites, for  
344 each of the force field in Table 1, before and after refinement (see also Supporting Information).  
345 PRE intensity-ratio profiles from a more expanded ensemble generated using A12 with TIP4P-D  
346 (Fig. 4A) and a more compact one generated with A12 with TIP3P (Fig. 4B) show clear differences in  
347 agreement before refinement with the SAXS data.

348 BME refinement leads only to small changes in the calculated PRE data for A12/TIP4P-D, whereas  
349 the selection of more expanded structures by applying BME to the ensemble generated with  
350 A12/TIP3P leads to more substantial changes as quantified for example by calculating the RMSD  
351 between simulation and experimental data (Fig. 4C and 4D). We performed similar calculations and  
352 analyses for all ensembles (Figs. S11–S18) and summarize the overall RMSD before and after BME  
353 (Fig. 4E). Especially for the force fields paired with TIP3P we observe many of the long-range contacts  
354 diminish after reweighting. These results suggest that the reweighting decreases contributions  
355 from structures that are too compact, and that the final reweighted ensemble contains more  
356 extended structures. In the TIP4P-D ensembles we still observe that some long-range contacts  
357 persist even after reweighting and the better agreement is not alone achieved at the cost of a  
358 complete elimination long-range contacts; nevertheless, the improvements of the PREs are generally  
359 small for these ensembles, and in the case of the metainference ensemble we even observe a small  
360 worsening of the agreement.

### 361 Conclusions

362 We have employed ‘on-the-fly’ or ‘post-facto’ integration between MD simulations and SAXS data  
363  $\alpha$ SN to derive structural ensembles that are in improved agreement with experiments. These  
364 approaches take their outset in a Bayesian framework, and thus the results of the posterior  
365 distribution may depend on the choice of the prior. Our results show, in line with previous  
366 observations (*Larsen et al., 2020*), clearly that if the prior distribution is a poor model for the  
367 experimental data, reweighting becomes noisy. Despite this we find that fitting against SAXS data  
368 generally improved or had no effect on the agreement with NMR data ( $R_h$  and PREs) that were not  
369 target of the optimisation. Thus, the inclusion of a SAXS-restraint in the metainference simulation  
370 and the BME refinement showed both methods were able to generate reliable and heterogenous  
371 ensemble that maintained good agreement with independent experimental data. We nevertheless

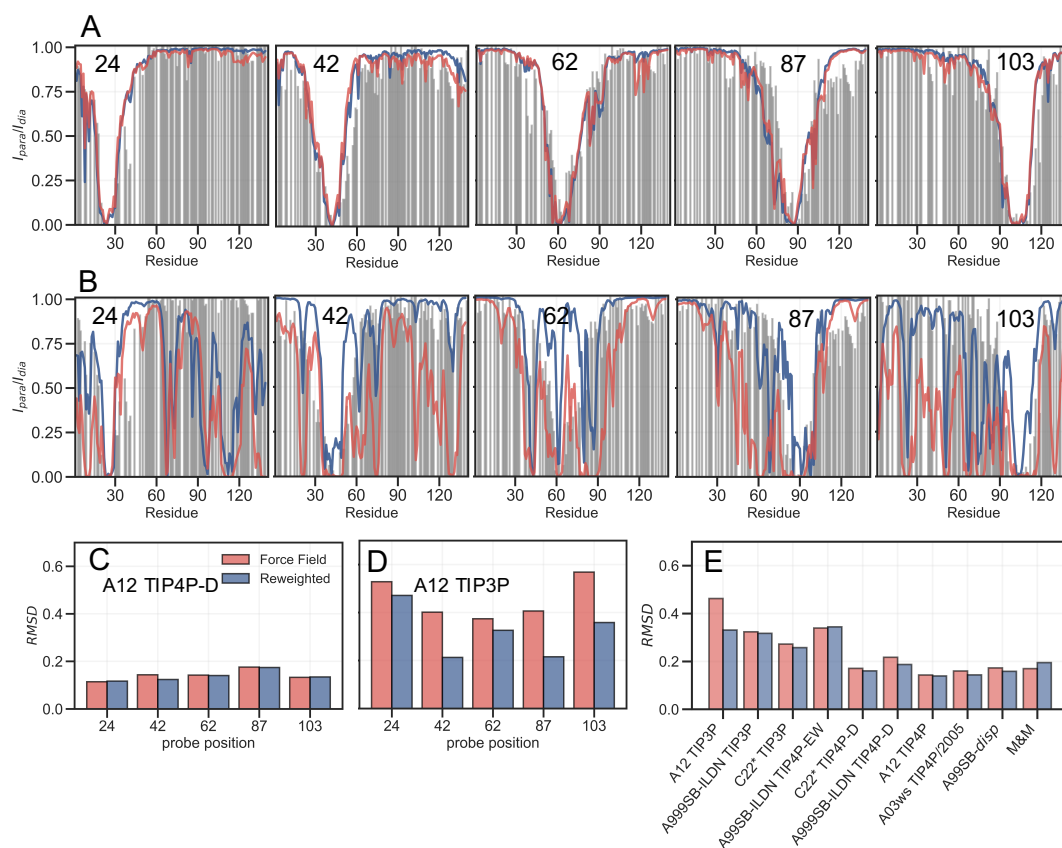

**Figure 4. Comparing ensembles to PRE data.** We calculated the PRE intensity ratios both from the prior (red) and the reweighted (blue) ensembles and compared to the experimental data (grey). As representative examples we again show results with the A12 protein force field combined with either (A) TIP4P-D or (B) TIP3P water models, and where the location of the spin label probe is denoted in each plot. Experimental intensity ratios slightly exceeding the value 1 were set to 1 in these plots. (C, D) We also calculated the RMSD between the experimental and calculated intensity ratios for each probe and the two force fields both before and after reweighting. (E) Finally, we calculated the RMSD between experiment and calculated values over all probe position for and all force fields in Table 1.

372 also find that the prior used in such protocols are important, and that more robust analyses are  
373 obtained with the best priors. Our calculations of  $R_h$  and PREs suggest that when the ensembles  
374 are 'far' away from the experimental data, then improvements driven by the SAXS refinement lead  
375 to clear improvements in independent parameters. For ensembles that show better agreement  
376 between with the SAXS data to begin with, the picture is less clear. While we on average observe  
377 improvements, they are often modest. While some of this is likely because the ensembles are  
378 already in reasonably good agreement with experiment, we also suggest that we are observing the  
379 limitations of the forward models for calculating SAXS,  $R_h$  and PREs. Thus, in addition to improving  
380 force fields, future research into finding improved and consistent forward models may be required  
381 to provide better models for intrinsically disordered proteins.

### 382 **Conflict of Interest Statement**

383 The authors declare that the research was conducted in the absence of any commercial or financial  
384 relationships that could be construed as a potential conflict of interest.

### 385 **Funding**

386 We acknowledge support by a grant from the Lundbeck Foundation to the BRAINSTRUC structural  
387 biology initiative (R155-2015-2666).

### 388 **Acknowledgments**

389 We thank A. Kikhney and C. Jeffries for assistance during data collection at the P12 SAXS beamline.  
390 We thank D. E. Shaw Research for sharing the molecular dynamics trajectories.

### 391 **References**

- 392 **Abascal JL**, Vega C. A general purpose model for the condensed phases of water: TIP4P/2005. The Journal of  
393 chemical physics. 2005; 123(23):234505.
- 394 **Abraham MJ**, Murtola T, Schulz R, Páll S, Smith JC, Hess B, Lindahl E. GROMACS: High performance molecular  
395 simulations through multi-level parallelism from laptops to supercomputers. *SoftwareX*. 2015; 1:19–25.
- 396 **Ahmed MC**, Crehuet R, Lindorff-Larsen K. Computing, Analyzing, and Comparing the Radius of Gyration and  
397 Hydrodynamic Radius in Conformational Ensembles of Intrinsically Disordered Proteins. In: *Intrinsically*  
398 *Disordered Proteins* Springer; 2020.p. 429–445.
- 399 **Barducci A**, Bussi G, Parrinello M. Well-tempered metadynamics: a smoothly converging and tunable free-  
400 energy method. *Physical review letters*. 2008; 100(2):020603.
- 401 **Bernado P**, Svergun DI. Structural analysis of intrinsically disordered proteins by small-angle X-ray scattering.  
402 *Molecular biosystems*. 2012; 8(1):151–167.
- 403 **Best RB**, Hummer G. Optimized molecular dynamics force fields applied to the helix- coil transition of polypep-  
404 tides. *The journal of physical chemistry B*. 2009; 113(26):9004–9015.
- 405 **Best RB**, Zheng W, Mittal J. Balanced protein–water interactions improve properties of disordered proteins and  
406 non-specific protein association. *Journal of chemical theory and computation*. 2014; 10(11):5113–5124.
- 407 **Best RB**, Zhu X, Shim J, Lopes PE, Mittal J, Feig M, MacKerell Jr AD. Optimization of the additive CHARMM all-atom  
408 protein force field targeting improved sampling of the backbone  $\phi$ ,  $\psi$  and side-chain  $\chi_1$  and  $\chi_2$  dihedral  
409 angles. *Journal of chemical theory and computation*. 2012; 8(9):3257–3273.
- 410 **Blanchet CE**, Spilotros A, Schwemmer F, Graewert MA, Kikhney A, Jeffries CM, Franke D, Mark D, Zengerle R,  
411 Cipriani F, Fiedler S, Roessle M, Svergun DI. Versatile sample environments and automation for biological  
412 solution X-ray scattering experiments at the P12 beamline (PETRA III, DESY). *Journal of Applied Crystallography*.  
413 2015; 48(2):431–443.
- 414 **Bonomi M**, Bussi G, Camilloni C, Tribello GA. Promoting transparency and reproducibility in enhanced molecular  
415 simulations. *Nature methods*. 2019; 16(8):670–673.

- 416 **Bonomi M**, Camilloni C. Integrative structural and dynamical biology with PLUMED-ISDB. *Bioinformatics*. 2017;  
417 33(24):3999–4000.
- 418 **Bonomi M**, Camilloni C, Cavalli A, Vendruscolo M. Metainference: A Bayesian inference method for heteroge-  
419 neous systems. *Science Advances*. 2016; 2(1):e1501177.
- 420 **Bonomi M**, Camilloni C, Vendruscolo M. Metadynamic metainference: enhanced sampling of the metainference  
421 ensemble using metadynamics. *Scientific reports*. 2016; 6:31232.
- 422 **Bottaro S**, Bengtsen T, Lindorff-Larsen K. Integrating molecular simulation and experimental data: a  
423 Bayesian/maximum entropy reweighting approach. In: *Structural Bioinformatics* Springer; 2020.p. 219–240.
- 424 **Bottaro S**, Lindorff-Larsen K, Best RB. Variational optimization of an all-atom implicit solvent force field to  
425 match explicit solvent simulation data. *Journal of chemical theory and computation*. 2013; 9(12):5641–5652.
- 426 **Box GE**, Tiao GC. Bayesian inference in statistical analysis, vol. 40. John Wiley & Sons; 2011.
- 427 **Cesari A**, Reißer S, Bussi G. Using the maximum entropy principle to combine simulations and solution  
428 experiments. *Computation*. 2018; 6(1):15.
- 429 **Chemes LB**, Alonso LG, Noval MG, de Prat-Gay G. Circular dichroism techniques for the analysis of intrinsically  
430 disordered proteins and domains. In: *Intrinsically disordered protein analysis* Springer; 2012.p. 387–404.
- 431 **Das RK**, Ruff KM, Pappu RV. Relating sequence encoded information to form and function of intrinsically  
432 disordered proteins. *Current opinion in structural biology*. 2015; 32:102–112.
- 433 **Dedmon MM**, Lindorff-Larsen K, Christodoulou J, Vendruscolo M, Dobson CM. Mapping long-range interactions  
434 in  $\alpha$ -synuclein using spin-label NMR and ensemble molecular dynamics simulations. *Journal of the American*  
435 *Chemical Society*. 2005; 127(2):476–477.
- 436 **Dyson HJ**, Wright PE. Nuclear magnetic resonance methods for elucidation of structure and dynamics in  
437 disordered states. *Methods in enzymology*. 2001; 339:258–270.
- 438 **Eliezer D**. Biophysical characterization of intrinsically disordered proteins. *Current opinion in structural biology*.  
439 2009; 19(1):23–30.
- 440 **Grudinin S**, Garkavenko M, Kazennov A. Pepsi-SAXS: an adaptive method for rapid and accurate computation of  
441 small-angle X-ray scattering profiles. *Acta Crystallographica Section D: Structural Biology*. 2017; 73(5):449–464.
- 442 **Hansen PC**, O’Leary DP. The use of the L-curve in the regularization of discrete ill-posed problems. *SIAM Journal*  
443 *on Scientific Computing*. 1993; 14(6):1487–1503.
- 444 **Henriques J**, Arleth L, Lindorff-Larsen K, Skepö M. On the calculation of SAXS profiles of folded and intrinsically  
445 disordered proteins from computer simulations. *Journal of molecular biology*. 2018; 430(16):2521–2539.
- 446 **Horn HW**, Swope WC, Pitera JW, Madura JD, Dick TJ, Hura GL, Head-Gordon T. Development of an improved  
447 four-site water model for biomolecular simulations: TIP4P-Ew. *The Journal of chemical physics*. 2004;  
448 120(20):9665–9678.
- 449 **Hornak V**, Abel R, Okur A, Strockbine B, Roitberg A, Simmerling C. Comparison of multiple Amber force fields and  
450 development of improved protein backbone parameters. *Proteins: Structure, Function, and Bioinformatics*.  
451 2006; 65(3):712–725.
- 452 **Hummer G**, Köfinger J. Bayesian ensemble refinement by replica simulations and reweighting. *The Journal of*  
453 *chemical physics*. 2015; 143(24):12B634\_1.
- 454 **Jaynes ET**. Information theory and statistical mechanics. *Physical review*. 1957; 106(4):620.
- 455 **Jorgensen WL**. Quantum and statistical mechanical studies of liquids. 10. Transferable intermolecular potential  
456 functions for water, alcohols, and ethers. Application to liquid water. *Journal of the American Chemical*  
457 *Society*. 1981; 103(2):335–340.
- 458 **Jussupow A**, Messias AC, Stehle R, Geerlof A, Solbak SM, Paissoni C, Bach A, Sattler M, Camilloni C. The dynamics  
459 of linear polyubiquitin. *Science advances*. 2020; 6(42):eabc3786.
- 460 **Laio A**, Parrinello M. Escaping free-energy minima. *Proceedings of the National Academy of Sciences*. 2002;  
461 99(20):12562–12566.

- 462 **Larsen AH**, Wang Y, Bottaro S, Grudin S, Arleth L, Lindorff-Larsen K. Combining molecular dynamics simula-  
463 tions with small-angle X-ray and neutron scattering data to study multi-domain proteins in solution. *PLoS*  
464 *computational biology*. 2020; 16(4):e1007870.
- 465 **Lazaridis T**, Karplus M. Effective energy function for proteins in solution. *Proteins: Structure, Function, and*  
466 *Bioinformatics*. 1999; 35(2):133–152.
- 467 **LeBlanc S**, Kulkarni P, Weninger K. Single Molecule FRET: A powerful tool to study intrinsically disordered  
468 proteins. *Biomolecules*. 2018; 8(4):140.
- 469 **Lindorff-Larsen K**, Piana S, Palmo K, Maragakis P, Klepeis JL, Dror RO, Shaw DE. Improved side-chain torsion  
470 potentials for the Amber ff99SB protein force field. *Proteins: Structure, Function, and Bioinformatics*. 2010;  
471 78(8):1950–1958.
- 472 **Löhr T**, Jussupow A, Camilloni C. Metadynamic meta-inference: Convergence towards force field independent  
473 structural ensembles of a disordered peptide. *The Journal of chemical physics*. 2017; 146(16):165102. doi:  
474 [10.1063/1.4981211](https://doi.org/10.1063/1.4981211).
- 475 **van Maarschalkerweerd A**, Vetri V, Langkilde AE, Foderà V, Vestergaard B. Protein/lipid coaggregates are  
476 formed during  $\alpha$ -synuclein-induced disruption of lipid bilayers. *Biomacromolecules*. 2014; 15(10):3643–3654.
- 477 **Nerenberg PS**, Jo B, So C, Tripathy A, Head-Gordon T. Optimizing solute–water van der waals interactions to  
478 reproduce solvation free energies. *The Journal of Physical Chemistry B*. 2012; 116(15):4524–4534.
- 479 **Niebling S**, Björling A, Westenhoff S. MARTINI bead form factors for the analysis of time-resolved X-ray scattering  
480 of proteins. *Journal of applied crystallography*. 2014; 47(4):1190–1198.
- 481 **Nygaard M**, Kragelund BB, Papaleo E, Lindorff-Larsen K. An efficient method for estimating the hydrodynamic  
482 radius of disordered protein conformations. *Biophysical journal*. 2017; 113(3):550–557.
- 483 **Orioli S**, Larsen AH, Bottaro S, Lindorff-Larsen K. How to learn from inconsistencies: Integrating molecular  
484 simulations with experimental data. In: *Progress in Molecular Biology and Translational Science*, vol. 170 Elsevier;  
485 2020.p. 123–176.
- 486 **Paissoni C**, Jussupow A, Camilloni C. Martini bead form factors for nucleic acids and their application in the  
487 refinement of protein–nucleic acid complexes against SAXS data. *Journal of Applied Crystallography*. 2019;  
488 52(2):394–402.
- 489 **Paissoni C**, Jussupow A, Camilloni C. Determination of Protein Structural Ensembles by Hybrid-Resolution SAXS  
490 Restrained Molecular Dynamics. *Journal of Chemical Theory and Computation*. 2020; 16(4):2825–2834.
- 491 **Panjkevich A**, Svergun DI. CHROMIXS: automatic and interactive analysis of chromatography-coupled small  
492 angle X-ray scattering data. *Bioinformatics*. 2018; 34(11):1944–19464.
- 493 **Pfaendtner J**, Bonomi M. Efficient sampling of high-dimensional free-energy landscapes with parallel bias  
494 metadynamics. *Journal of chemical theory and computation*. 2015; 11(11):5062–5067.
- 495 **Piana S**, Donchev AG, Robustelli P, Shaw DE. Water dispersion interactions strongly influence simulated structural  
496 properties of disordered protein states. *The journal of physical chemistry B*. 2015; 119(16):5113–5123.
- 497 **Piana S**, Lindorff-Larsen K, Shaw DE. How robust are protein folding simulations with respect to force field  
498 parameterization? *Biophysical journal*. 2011; 100(9):L47–L49.
- 499 **Prestel A**, Bugge K, Staby L, Hendus-Altenburger R, Kragelund BB. Characterization of dynamic IDP complexes  
500 by NMR spectroscopy. In: *Methods in enzymology*, vol. 611 Elsevier; 2018.p. 193–226.
- 501 **Raiteri P**, Laio A, Gervasio FL, Micheletti C, Parrinello M. Efficient reconstruction of complex free energy  
502 landscapes by multiple walkers metadynamics. *The journal of physical chemistry B*. 2006; 110(8):3533–3539.
- 503 **Robustelli P**, Piana S, Shaw DE. Developing a molecular dynamics force field for both folded and disordered  
504 protein states. *Proceedings of the National Academy of Sciences*. 2018; 115(21):E4758–E4766.
- 505 **Skaanning LK**, Santoro A, Skamris T, Martinsen JH, D’Ursi AM, Bucciarelli S, Vestergaard B, Bugge K, Langkilde  
506 AE, Kragelund BB. The Non-Fibrillating N-Terminal of  $\alpha$ -Synuclein Binds and Co-Fibrillates with Heparin.  
507 *Biomolecules*. 2020; 10(8):1192.
- 508 **Snead D**, Eliezer D. Intrinsically disordered proteins in synaptic vesicle trafficking and release. *Journal of*  
509 *Biological Chemistry*. 2019; 294(10):3325–3342.

- 510 **Song D**, Luo R, Chen HF. The IDP-specific force field ff14IDPSFF improves the conformer sampling of intrinsically  
511 disordered proteins. *Journal of chemical information and modeling*. 2017; 57(5):1166–1178.
- 512 **Spillantini MG**, Goedert M. The  $\alpha$ -synucleinopathies: Parkinson's disease, dementia with Lewy bodies, and  
513 multiple system atrophy. *Annals of the New York Academy of Sciences*. 2000; 920(1):16–27.
- 514 **Sugita Y**, Okamoto Y. Replica-exchange molecular dynamics method for protein folding. *Chemical physics  
515 letters*. 1999; 314(1-2):141–151.
- 516 **Sun Y**, Kollman PA. Hydrophobic solvation of methane and nonbond parameters of the TIP3P water model.  
517 *Journal of computational chemistry*. 1995; 16(9):1164–1169.
- 518 **Tesei G**, Martins JM, Kunze MB, Wang Y, Crehuet R, Lindorff-Larsen K. DEER-PREdict: software for efficient  
519 calculation of Spin-Labeling EPR and NMR data from conformational ensembles. *bioRxiv*. 2020; .
- 520 **Tribello GA**, Bonomi M, Branduardi D, Camilloni C, Bussi G. PLUMED 2: New feathers for an old bird. *Computer  
521 Physics Communications*. 2014; 185(2):604–613.
- 522 **Ulmer TS**, Bax A, Cole NB, Nussbaum RL. Structure and dynamics of micelle-bound human  $\alpha$ -synuclein. *Journal  
523 of Biological Chemistry*. 2005; 280(10):9595–9603.
- 524 **Ulusoy A**, Di Monte DA.  $\alpha$ -Synuclein elevation in human neurodegenerative diseases: Experimental, patho-  
525 genetic, and therapeutic implications. *Molecular neurobiology*. 2013; 47(2):484–494.
- 526 **Uversky VN**, Oldfield CJ, Dunker AK. Showing your ID: intrinsic disorder as an ID for recognition, regulation and  
527 cell signaling. *Journal of Molecular Recognition: An Interdisciplinary Journal*. 2005; 18(5):343–384.
- 528 **Wilkins DK**, Grimshaw SB, Receveur V, Dobson CM, Jones JA, Smith LJ. Hydrodynamic radii of native and  
529 denatured proteins measured by pulse field gradient NMR techniques. *Biochemistry*. 1999; 38(50):16424–  
530 16431.
- 531 **Wu D**, Chen A, Johnson CS. An improved diffusion-ordered spectroscopy experiment incorporating bipolar-  
532 gradient pulses. *Journal of magnetic resonance, Series A*. 1995; 115(2):260–264.
